# Supplementary material for: Gut colonization of Enterococcus species is associated with COVID-19 disease in Uganda
Source: bioRxiv or medRxiv preprint supplement (doi:10.1101/2024.09.28.24314457), 2024-09-30
Supplement: Supplementary file [file media-1.pdf]

**Supplemental Materials for Agudelo, Kateete, Nasinghe, et al.**

**Suppl. Table 1** See attached

**Suppl. Table 2**

**Supplemental Table 2.** Primer and adaptor sequences

PCR1 primers - amplifying V4 region of 16S rRNA

|                 |                                                        |
|-----------------|--------------------------------------------------------|
| V4_515F_Nextera | TCGTCGGCAGCGTCAGATGTGTATAAGAGACAGGTGCCAGCMGCCGCGGTAA   |
| V4_806R_Nextera | GTCTCGTGGGCTCGGAGATGTGTATAAGAGACAGGGACTACHVGGGTWTCTAAT |

Illumina Index adaptors

|               |                                                    |
|---------------|----------------------------------------------------|
| Forward index | AATGATACGGGACCACCGAGATCTACACXXXXXXXXTCGTCGGCAGCGTC |
| Reverse index | CAAGCAGAAGACGGCATACGAGATXXXXXXXXGTCTCGTGGGCTCGG    |

**Suppl. Table 3**

**Supplemental Table 3.** AMR genes identified in *Enterococcus* species

| Antimicrobial resistance gene | Drug class                                                                       | Mechanism                    | Model           | Reads Species                                                                                       |
|-------------------------------|----------------------------------------------------------------------------------|------------------------------|-----------------|-----------------------------------------------------------------------------------------------------|
| AAC(6)-II                     | aminoglycoside antibiotic                                                        | antibiotic inactivation      | protein homolog | <i>Enterococcus</i> (chromosome)                                                                    |
| dfpE                          | diaminopyrimidine antibiotic                                                     | antibiotic target protection | protein homolog | <i>Enterococcus faecalis</i> (chromosome)                                                           |
| efmA                          | fluoroquinolone antibiotic;<br>macrolide antibiotic                              | antibiotic efflux            | protein homolog | <i>Enterococcus faecium</i> (chromosome)                                                            |
| efrA                          | fluoroquinolone antibiotic;<br>macrolide antibiotic;<br>rifamycin antibiotic     | antibiotic efflux            | protein homolog | <i>Enterococcus faecalis</i> (chromosome)                                                           |
| efrB                          | fluoroquinolone antibiotic;<br>macrolide antibiotic;<br>rifamycin antibiotic     | antibiotic efflux            | protein homolog | <i>Enterococcus faecalis</i> (chromosome)                                                           |
| ErmB                          | lincosamide antibiotic;<br>macrolide antibiotic;<br>streptogramin antibiotic     | antibiotic target protection | protein homolog | <i>Enterococcus faecalis</i> (chromosome or plasmid)                                                |
| ErmT                          | lincosamide antibiotic;<br>macrolide antibiotic;<br>streptogramin antibiotic     | antibiotic target protection | protein homolog | <i>Enterococcus faecium</i> (chromosome or plasmid)                                                 |
| lsaA                          | lincosamide antibiotic;<br>pleuromutilin antibiotic;<br>streptogramin antibiotic | antibiotic target protection | protein homolog | <i>Enterococcus</i> (chromosome); <i>Enterococcus faecalis</i> (chromosome)                         |
| msrC                          | macrolide antibiotic;<br>streptogramin antibiotic                                | antibiotic target protection | protein homolog | <i>Enterococcus faecium</i> (chromosome)                                                            |
| tet(L)                        | tetracycline antibiotic                                                          | antibiotic efflux            | protein homolog | <i>Enterococcus</i> (chromosome or plasmid);<br><i>Enterococcus faecium</i> (chromosome or plasmid) |
| tet(M)                        | tetracycline antibiotic                                                          | antibiotic target protection | protein homolog | <i>Enterococcus faecium</i> (chromosome or plasmid)                                                 |
| tet(U)                        | tetracycline antibiotic                                                          | antibiotic efflux            | protein homolog | <i>Enterococcus faecium</i> (chromosome or plasmid)                                                 |

## Suppl. Table 4

**Supplemental Table 4.** USA irritable bowel disease (IBD) studies used for meta-analysis of *Enterococcus* abundance.

| Study name                                                                                                                                                                                                    | Citation                               | Studies by Geography | Location | SRA         |
|---------------------------------------------------------------------------------------------------------------------------------------------------------------------------------------------------------------|----------------------------------------|----------------------|----------|-------------|
| Gut microbiome structure and metabolic activity in inflammatory bowel disease                                                                                                                                 | Franzosa, Eric A et al., 2019          | USA_PRISM_1          | USA      | PRJNA400072 |
| Short Article Gut Microbiome Function Predicts Response to Anti-integrin Biologic Therapy in Inflammatory Bowel Diseases                                                                                      | Ananthakrishnan, Ashwin N et al., 2017 | USA_PRISM_2          | USA      | PRJNA384246 |
| Gastrointestinal Surgery for Inflammatory Bowel Disease Persistently Lowers Microbiome and Metabolome Diversity                                                                                               | Fang, Xin et al., 2021                 | USA_QIITA_11546      | USA      | PRJEB38352  |
| Multi-omics analyses of the ulcerative colitis gut microbiome link <i>Bacteroides vulgatus</i> proteases with disease severity                                                                                | Mills, Robert H et al., 2022           | USA_QIITA_11549      | USA      | PRJEB42151  |
| Dietary manipulation of the gut microbiome in inflammatory bowel disease patients: Pilot study                                                                                                                | Oleznick, Barbara et al., 2022         | USA_umass            | USA      | PRJNA642308 |
| Overrepresentation of Enterobacteriaceae and <i>Escherichia coli</i> is the major gut microbiome signature in Crohn's disease and ulcerative colitis; a comprehensive metagenomic analysis of IBDMDB datasets | Khorsand, Babak et al., 2022           | USA_hmbp             | USA      | PRJNA400072 |

**Suppl. Fig 1**

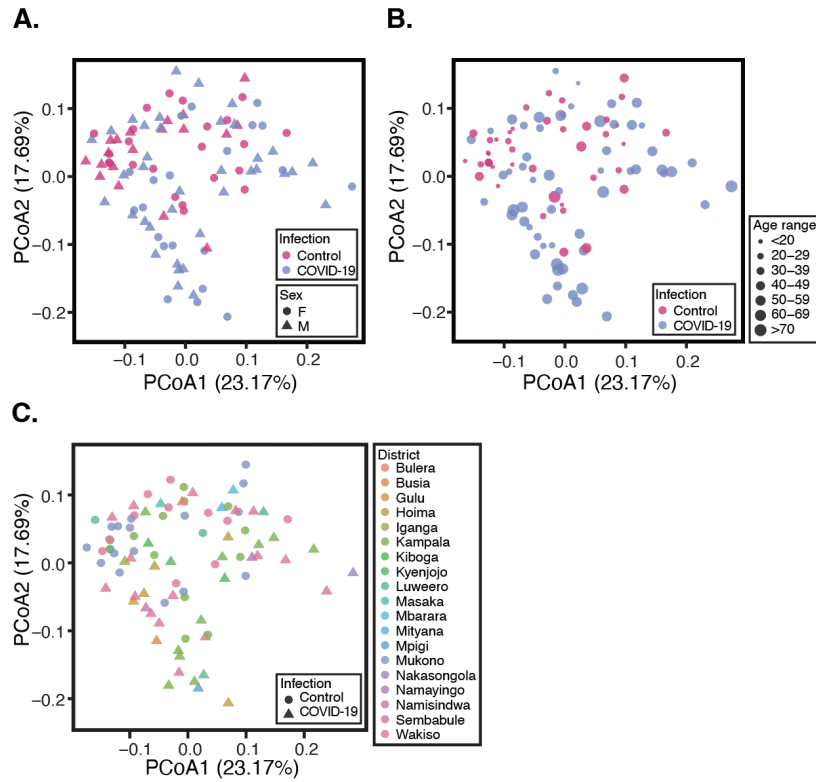

**Supplemental Fig. 1. A.** Principal coordinate analysis (PCoA) calculated using the weighted UniFrac distance metric is shown for males and females ( $p = 0.374$ , PERMANOVA;  $p = 0.622$ , PERMDISP). The same PCoA is also plotted with point size indicating age range (**B**;  $p < 0.01$ , PERMANOVA;  $p < 0.01$ , PERMDISP) or point color indicating district of residence (**C**).

**Suppl. Fig 2.**

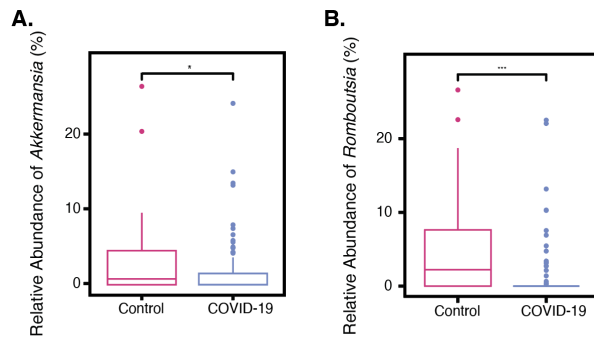

**Supplemental Fig. 2** Genera differentially abundant between COVID-19 cases and controls. The relative abundance of **A** *Akkermansia* species ( $p^* < 0.05$ , Kruskal-Wallis) and **B** *Romboutsia* species ( $p^{***} < 0.0005$ , Kruskal-Wallis) in positive COVID-19 individuals and asymptomatic individuals.

### Suppl. Fig. 3

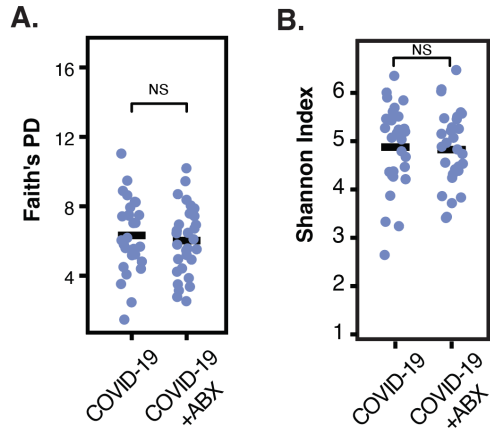

**Supplemental Fig. 3** The gut microbiome of individuals with COVID-19 with antibiotic treatment is not significantly different than individuals with COVID-19 without antibiotics. Alpha diversity is shown using **A** Faith's Phylogenetic Diversity (PD) and **B** the Shannon Index ( $p = 0.544$  Faith's PD,  $p = 0.644$  Shannon) (ABX = antibiotics, not significant - NS, Kruskal-Wallis).

### Suppl. Fig. 4

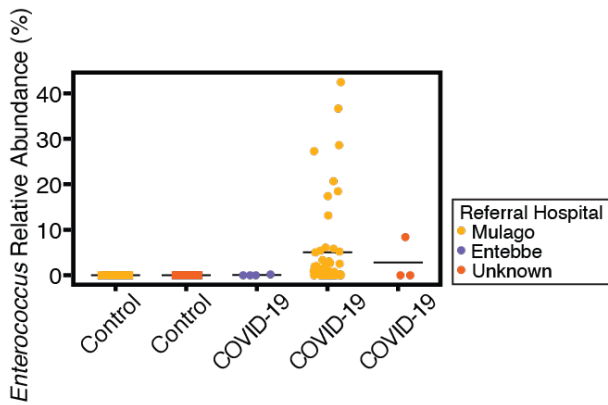

**Supplemental Fig. 4** *Enterococcus* abundance plotted by referral hospital the sample was collected at.
